# Supplementary material
Source: PubMed Central journal article supplement (PMC5022413)
Supplement: kpsb-11-08-1215792-s001.pdf [file kpsb-11-08-1215792-s001.pdf]

Supplemental figures

Sultana Rasheed<sup>1,2</sup>, Khurram Bashir<sup>1</sup>, Kentaro Nakaminami<sup>1</sup>, Kousuke Hanada<sup>3,4</sup>, Akihiro Matsui<sup>1</sup>, Motoaki Seki<sup>1,2,4</sup>

**Drought stress differentially regulates the expression of small open reading frames (sORFs) in *Arabidopsis* roots and shoots. Plant Signaling and Behavior.**

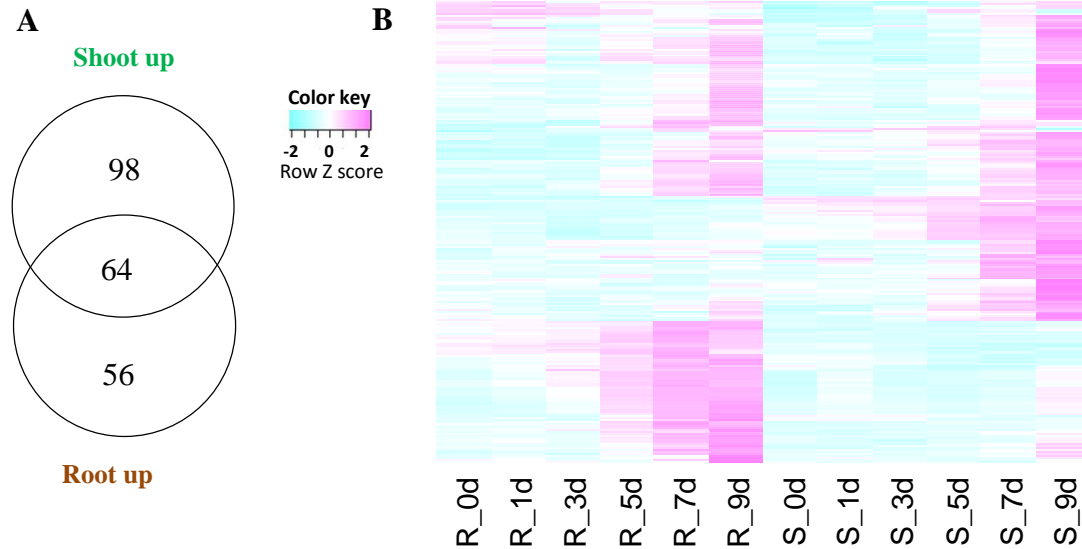

**Figure S1: sORFs up-regulated in response to a progressive drought stress treatment.**  
**A).** Venn diagram of sORFs up-regulated in roots and shoots during at least one stage of a drought stress treatment. **B).** Heat map reflecting changes in sORF expression in roots and shoots during different stages of the response to a drought stress treatment.

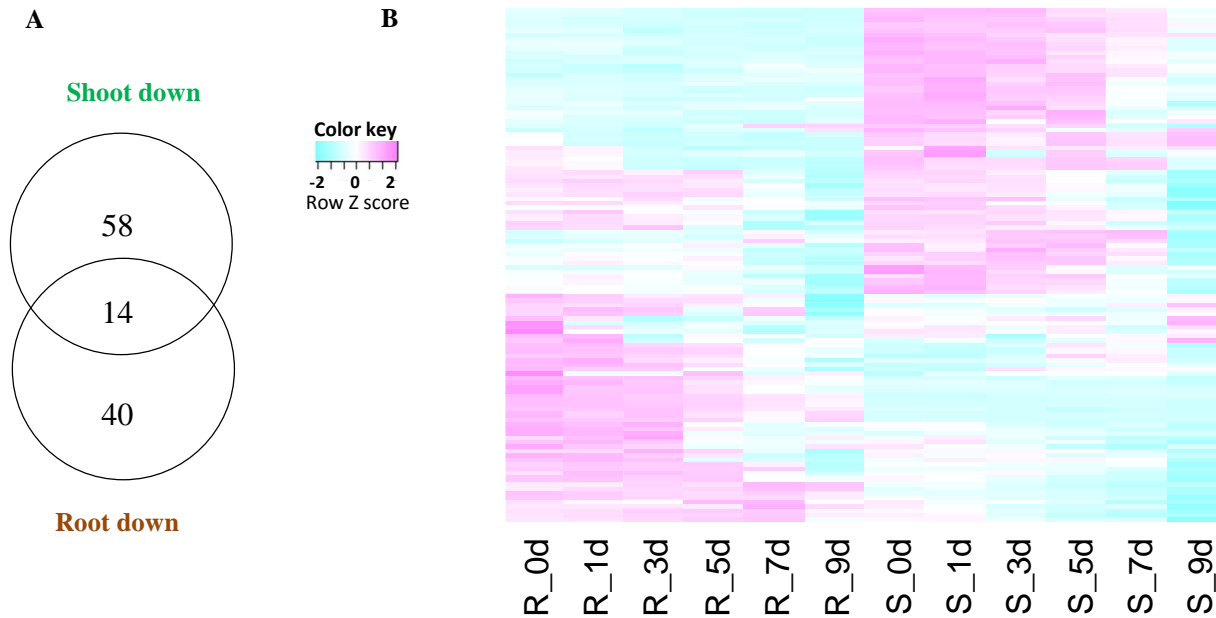

**Figure S2: sORFs down-regulated in response to a progressive drought stress treatment.**

**A).** Venn diagram of sORFs down-regulated in roots and shoots during at least one stage of a drought stress treatment. **B).** Heat map reflecting changes in sORF expression in roots and shoots during different stages of the response to a drought stress treatment.

**A**

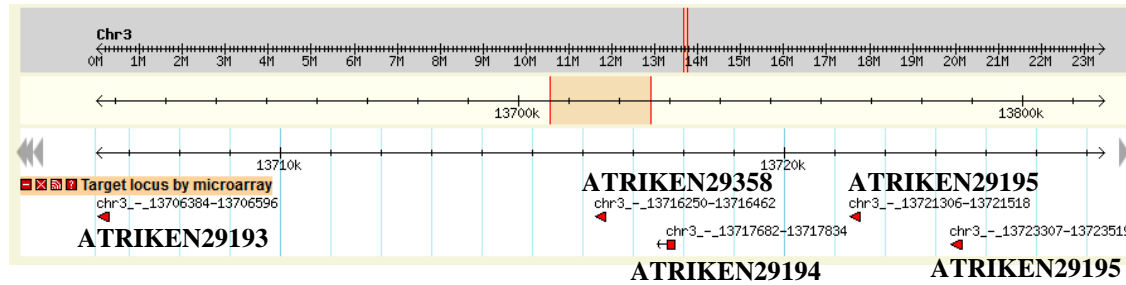

1 Kb

**B**

|              |                                                                                     |    |
|--------------|-------------------------------------------------------------------------------------|----|
| ATRIKEN29193 | MVFQYFAYIKALIKKIGYSYIAGGTHGKWI I KSLKKNRYDY I AYSNRCDHTSTNAPGPIRTPQLRVLGRE          | 70 |
| ATRIKEN29195 | MV <b>I</b> QYFAYIKALIKKIGYSYIAGGTHGKWI I KSLKKNRYDY I AYSNRCDHTSTNAPDSIRTPQLRVLGRE | 70 |
| ATRIKEN29358 | MVFQYFAYIKALIKKIGYSYIAGETHGKWI I KSLKKNRYDY I AYSNRCDHTSTNVPDSIRTSQLRVLGRE          | 70 |

**C**

|              |                                                                                    |    |
|--------------|------------------------------------------------------------------------------------|----|
| ATRIKEN29357 | M <b>Q</b> HE <b>Y</b> FF <b>P</b> GGHPS <b>Y</b> YYSRPSMLNCGVLMGSGALV <b>L</b> V- | 35 |
| ATRIKEN29359 | MQYEDIPRGHPSSYYSRPSTLN <b>Y</b> VVLMGSGALV <b>L</b> V-                             | 35 |
| ATRIKEN29360 | MQYEDIP <b>Q</b> GHPSYYSRPSTLNCGVLMGSGALV <b>L</b> V-                              | 35 |
| ATRIKEN29361 | MQHEDIPRGHPSSYYSRPSTLNCGVLMG <b>S</b> SALV <b>L</b> V-                             | 35 |

**Figure S3: Sequence similarity between peptides putatively encoded by sORFs.**

**A).** Position of different sORFs on chromosome 3 of *Arabidopsis*. **B).** Sequence similarity between ATRIKEN29193, ATRIKEN29195, and ATRIKEN29358. **C).** Sequence similarity between ATRIKEN29357, ATRIKEN29359, ATRIKEN29360, and ATRIKEN29361. Conserved amino acids are highlighted in yellow.
